# Supplementary material for: The phytochemical, biological, and medicinal attributes of phytoecdysteroids: An updated review
Source: PubMed Central journal article supplement — Acta Pharm Sin B. 2020 Oct 16;11(7):1740–66. doi: 10.1016/j.apsb.2020.10.012 (PMC8343124; doi:10.1016/j.apsb.2020.10.012), 2020-10-16
Supplement: mmc1.pdf [file mmc1.pdf]

## Supporting Information for

### Review

#### **The phytochemical, biological, and medicinal attributes of phytoecdysteroids: an updated review**

Niranjan Das<sup>a,\*</sup>, Siddhartha Kumar Mishra<sup>b</sup>, Anusha Bishayee<sup>c</sup>, Eunüs S. Ali<sup>d</sup>, Anupam Bishayee<sup>e,\*</sup>

<sup>a</sup>*Department of Chemistry, Iswar Chandra Vidyasagar College, Belonia-799 155, Tripura, India*

<sup>b</sup>*Cancer Biology Laboratory, Department of Zoology, School of Biological Sciences, Dr. Harisingh Gour Central University, Sagar-470 003, Madhya Pradesh, India*

<sup>c</sup>*Pine View School, Osprey FL 34229, USA*

<sup>d</sup>*Department of Biochemistry and Molecular Genetics, Feinberg School of Medicine, Northwestern University, Chicago IL 60611, USA*

<sup>e</sup>*Lake Erie College of Osteopathic Medicine, Bradenton FL 34211, USA*

Received 11 August 2020; received in revised form 4 September 2020; accepted 28 September 2020

\*Corresponding authors. Tel./fax: +91 3823222262 (Niranjan Das); +1 941 7825950 (Anupam Bishayee).

E-mail addresses: [ndnsmu@gmail.com](mailto:ndnsmu@gmail.com) (Niranjan Das); [abishayee@lecom.edu](mailto:abishayee@lecom.edu) or [abishayee@gmail.com](mailto:abishayee@gmail.com) (Anupam Bishayee).

**Table S1** Naturally-occurring new phytoecdysteroids with their sources reported since 1999.

| Compd. | Ecdysteroid                                                                                                                         | Plant                       | Plant family  | Plant partused | Fraction used                                                  | Ref. |
|--------|-------------------------------------------------------------------------------------------------------------------------------------|-----------------------------|---------------|----------------|----------------------------------------------------------------|------|
| 5      | 2,22-Dideoxy-20-hydroxyecdysone<br>25- <i>O</i> - $\beta$ -D-glucopyranoside                                                        | <i>Froelichia floridana</i> | Amaranthaceae | Whole plants   | 95% Ethanol extract                                            | 41   |
| 6      | 2,22-Dideoxyecdysone<br>25- <i>O</i> - $\beta$ -D-glucopyranosyl-(1 $\rightarrow$ 2)- $\beta$ -D-glucopyranoside                    | <i>Froelichia floridana</i> | Amaranthaceae | Whole plants   | 95% Ethanol extract                                            | 41   |
| 7      | 2,22-Deoxyecdysone<br>25- <i>O</i> - $\beta$ -D-glucopyranoside                                                                     | <i>Froelichia floridana</i> | Amaranthaceae | Whole plants   | 95% Ethanol extract                                            | 41   |
| 8      | (5 $\alpha$ )-2,22-Dideoxyecdysone<br>25- <i>O</i> - $\beta$ -D-glucopyranosyl-(1 $\rightarrow$ 2)- $\beta$ -D-glucopyranoside      | <i>Froelichia floridana</i> | Amaranthaceae | Whole plants   | 95% Ethanol extract                                            | 41   |
| 9      | 2,22-Dideoxy-5 $\beta$ -hydroxyecdysone<br>25- <i>O</i> - $\beta$ -D-glucopyranosyl-(1 $\rightarrow$ 2)- $\beta$ -D-glucopyranoside | <i>Froelichia floridana</i> | Amaranthaceae | Whole plants   | 95% Ethanol extract                                            | 41   |
| 10     | 20,26-Dihydroxy 28-methyl ecdysone                                                                                                  | <i>Chenopodium quinoa</i>   | Amaranthaceae | Seeds          | 80% Aqueous methanol extract                                   | 43   |
| 11     | 20,26-Dihydroxy 24(28)-dehydro ecdysone                                                                                             | <i>Chenopodium quinoa</i>   | Amaranthaceae | Seeds          | 80% Aqueous methanol extract                                   | 43   |
| 12     | 20-Hydroxyecdysone 22-glycolate                                                                                                     | <i>Chenopodium quinoa</i>   | Amaranthaceae | Seeds          | 80% Aqueous methanol extract                                   | 43   |
| 13     | Kancollosterone                                                                                                                     | <i>Chenopodium quinoa</i>   | Amaranthaceae | Seeds          | Methanol extract, <i>n</i> -BuOH fraction                      | 42   |
| 14     | 3 $\beta$ ,14 $\alpha$ -Dihydroxy-5 $\beta$ -pregn-7-ene-2,6,20-trione                                                              | <i>Chenopodium album</i>    | Amaranthaceae | Leaves         | Acetone precipitate of the H <sub>2</sub> O:MeOH (9:1) extract | 44   |

|    |                                                                                                                                    |                                   |               |         |                                             |    |
|----|------------------------------------------------------------------------------------------------------------------------------------|-----------------------------------|---------------|---------|---------------------------------------------|----|
| 15 | 24,25-Dehydroinokosterone                                                                                                          | <i>Chenopodium album</i><br>Willd | Amaranthaceae | Seeds   | 95% Ethanol extract                         | 45 |
| 16 | 25,27-Dehydroinokosterone                                                                                                          | <i>Chenopodium album</i><br>Willd | Amaranthaceae | Seeds   | 95% Ethanol extract                         | 45 |
| 17 | 5 $\beta$ -Hydroxy-24(28)-dehydromakisterone A                                                                                     | <i>Chenopodium album</i><br>Willd | Amaranthaceae | Seeds   | 95% Ethanol extract                         | 45 |
| 18 | Niuxixinsterone A                                                                                                                  | <i>Achyranthes bidentata</i>      | Amaranthaceae | Roots   | 95% Ethanol extract                         | 46 |
| 19 | Niuxixinsterone B                                                                                                                  | <i>Achyranthes bidentata</i>      | Amaranthaceae | Roots   | 95% Ethanol extract                         | 46 |
| 20 | Niuxixinsterone C                                                                                                                  | <i>Achyranthes bidentata</i>      | Amaranthaceae | Roots   | 95% Ethanol extract                         | 46 |
| 21 | Niuxixinsterone D                                                                                                                  | <i>Achyranthes bidentata</i>      | Amaranthaceae | Roots   | 95% Ethanol extract                         | 47 |
| 22 | (25 <i>S</i> )-20,22- <i>O</i> -( <i>R</i> -Ethylidene)inokosterone                                                                | <i>Achyranthes bidentata</i>      | Amaranthaceae | Roots   | 95% Ethanol extract                         | 48 |
| 23 | 20,22- <i>O</i> -( <i>R</i> -3-Methoxycarbonyl)propylidene-20-hydroxyecdysone                                                      | <i>Achyranthes bidentata</i>      | Amaranthaceae | Roots   | 95% Ethanol extract                         | 48 |
| 24 | Achyranthesterone A                                                                                                                | <i>Achyranthes bidentata</i>      | Amaranthaceae | Roots   | 75% Ethanol extract, ethyl acetate fraction | 49 |
| 25 | (20 <i>R</i> ,22 <i>R</i> )-2 $\beta$ ,3 $\beta$ ,20,22,26-pentahydroxy-cholestan-7,12-dien-6-one                                  | <i>Achyranthes bidentata</i>      | Amaranthaceae | Roots   | Methanol extract                            | 50 |
| 26 | Aervedysteroid A<br>(20,25-epoxy-2 $\beta$ ,3 $\beta$ ,14 $\alpha$ ,22 $\beta$ -tetrahydroxy-5 $\beta$ -ecdysteroid)               | <i>Aerva javanica</i>             | Amaranthaceae | Flowers | Methanol extract, ethyl acetate fraction    | 51 |
| 27 | Aervedysteroid B<br>(24,28-dehydro-20,25-epoxy-2 $\beta$ ,3 $\beta$ ,14 $\alpha$ ,22 $\beta$ -tetrahydroxy-5 $\beta$ -ecdysteroid) | <i>Aerva javanica</i>             | Amaranthaceae | Flowers | Methanol extract, ethyl acetate fraction    | 51 |

|    |                                                                                                                                      |                                           |               |         |                                                                      |    |
|----|--------------------------------------------------------------------------------------------------------------------------------------|-------------------------------------------|---------------|---------|----------------------------------------------------------------------|----|
| 28 | Aervedysteroid C<br>(1 $\beta$ ,3 $\beta$ ,14 $\alpha$ ,20 $\beta$ ,22 $\beta$ ,25-hexahydroxy-5 $\beta$ -ecdysteroid)               | <i>Aerva javanica</i>                     | Amaranthaceae | Flowers | Methanol extract, ethyl acetate fraction                             | 51 |
| 29 | Aervedysteroid D<br>(24,28-dehydro-1 $\beta$ ,3 $\beta$ ,14 $\alpha$ ,20 $\beta$ ,22 $\beta$ ,25-hexahydroxy-5 $\beta$ -ecdysteroid) | <i>Aerva javanica</i>                     | Amaranthaceae | Flowers | Methanol extract, ethyl acetate fraction                             | 51 |
| 30 | 2,3-Isopropylidene cyasterone                                                                                                        | <i>Cyathula officinalis</i><br>Kuan       | Amaranthaceae | Roots   | 95% Ethanol extract,<br><i>n</i> -BuOH fraction                      | 52 |
| 31 | 24-Hydroxycyasterone                                                                                                                 | <i>Cyathula officinalis</i><br>Kuan       | Amaranthaceae | Roots   | 95% Ethanol extract,<br><i>n</i> -BuOH fraction                      | 52 |
| 32 | 2,3-Isopropylidene isocyasterone                                                                                                     | <i>Cyathula officinalis</i><br>Kuan       | Amaranthaceae | Roots   | 95% Ethanol extract,<br><i>n</i> -BuOH fraction                      | 52 |
| 33 | Pfaffiaglycosides C                                                                                                                  | <i>Pfaffia glomerata</i>                  | Amaranthaceae | Roots   | Methanol extract                                                     | 53 |
| 34 | Pfaffiaglycosides D                                                                                                                  | <i>Pfaffia glomerata</i>                  | Amaranthaceae | Roots   | Methanol extract                                                     | 53 |
| 35 | Pfaffiaglycosides E                                                                                                                  | <i>Pfaffia glomerata</i>                  | Amaranthaceae | Roots   | Methanol extract                                                     | 53 |
| 36 | (20 <i>R</i> )-22-Deoxy-20,21-dihydroxyecdysone                                                                                      | <i>Rhagodia baccata</i><br>(Labill.) Moq. | Amaranthaceae | Seeds   | Methanol extract                                                     | 54 |
| 37 | Septanoecdysone                                                                                                                      | <i>Atriplex portulacoides</i> L.          | Amaranthaceae | Roots   | MeOH:H <sub>2</sub> O (1:1) extract,<br><i>n</i> -BuOH fractionation | 55 |
| 38 | Inokosterone 20,22-acetonide                                                                                                         | <i>Leuzea carthamoides</i>                | Asteraceae    | Roots   | MeOH:H <sub>2</sub> O (1:1) extract,<br><i>n</i> -BuOH fractionation | 56 |

|    |                                                                            |                                           |            |              |                                                                      |    |
|----|----------------------------------------------------------------------------|-------------------------------------------|------------|--------------|----------------------------------------------------------------------|----|
| 39 | Integristerone A-20,22-acetonide                                           | <i>Leuzea carthamoides</i>                | Asteraceae | Roots        | MeOH:H <sub>2</sub> O (1:1) extract,<br><i>n</i> -BuOH fractionation | 56 |
| 40 | 15-Hydroxyponasterone A                                                    | <i>Leuzea carthamoides</i>                | Asteraceae | Roots        | MeOH:H <sub>2</sub> O (1:1) extract,<br><i>n</i> -BuOH fractionation | 56 |
| 41 | 14- <i>epi</i> -Ponasterone A<br>22- <i>O</i> - $\beta$ -D-glucopyranoside | <i>Leuzea carthamoides</i>                | Asteraceae | Roots        | MeOH:H <sub>2</sub> O (1:1) extract,<br><i>n</i> -BuOH fractionation | 56 |
| 42 | Carthamoleusterone                                                         | <i>Leuzea carthamoides</i>                | Asteraceae | Roots        | MeOH:H <sub>2</sub> O (1:1) extract,<br><i>n</i> -BuOH fractionation | 56 |
| 43 | 22-Deoxy-28-hydroxymakisterone C                                           | <i>Leuzea carthamoides</i>                | Asteraceae | Roots        | MeOH:H <sub>2</sub> O (1:1) extract,<br><i>n</i> -BuOH fractionation | 56 |
| 44 | 26-Hydroxymakisterone C                                                    | <i>Leuzea carthamoides</i>                | Asteraceae | Roots        | MeOH:H <sub>2</sub> O (1:1) extract,<br><i>n</i> -BuOH fractionation | 56 |
| 45 | 1 $\beta$ -Hydroxymakisterone C                                            | <i>Leuzea carthamoides</i>                | Asteraceae | Roots        | MeOH:H <sub>2</sub> O (1:1) extract,<br><i>n</i> -BuOH fractionation | 56 |
| 46 | Lesterone                                                                  | <i>Leuzea carthamoides</i>                | Asteraceae | Seeds        | <i>n</i> -BuOH fraction of<br>methanolic extract                     | 57 |
| 47 | Leuzeasterone                                                              | <i>Leuzea carthamoides</i><br>(Willd.) DC | Asteraceae | Roots        | Liquid–liquid extractions                                            | 58 |
| 48 | (24 <i>Z</i> )-29-Hydroxy-24(28)-dehydromakisterone C                      | <i>Leuzea carthamoides</i><br>(Willd.) DC | Asteraceae | Roots        | Liquid–liquid extractions                                            | 58 |
| 49 | Coronasterone (2-deoxy-3- <i>epi</i> -4 $\beta$<br>20-dihydroxyecdysone)   | <i>Serratula coronate</i>                 | Asteraceae | Aerial parts | Ethyl acetate extract                                                | 59 |
| 50 | 20-Hydroxyecdysone-2- <i>O</i> - $\beta$ -D-galactopyranoside              | <i>Serratula chinensis</i>                | Asteraceae | Roots        | 95% Ethanol extract,<br><i>n</i> -BuOH fraction                      | 60 |

|           |                                                                                   |                              |            |         |                                              |    |
|-----------|-----------------------------------------------------------------------------------|------------------------------|------------|---------|----------------------------------------------|----|
| <b>51</b> | 3- <i>O</i> -Acetyl-20-hydroxyecdysone-2- <i>O</i> - $\beta$ -D-galactopyranoside | <i>Serratula chinensis</i>   | Asteraceae | Roots   | 95% Ethanol extract, <i>n</i> -BuOH fraction | 60 |
| <b>52</b> | 3- <i>O</i> -Acetyl-20-hydroxyecdysone-2- <i>O</i> - $\beta$ -D-glucopyranoside   | <i>Serratula chinensis</i>   | Asteraceae | Roots   | 95% Ethanol extract, <i>n</i> -BuOH fraction | 60 |
| <b>53</b> | 24- <i>O</i> -Acetyl- <i>epi</i> -abutasterone                                    | <i>Serratula chinensis</i>   | Asteraceae | Roots   | 95% Ethanol extract, <i>n</i> -BuOH fraction | 60 |
| <b>54</b> | 20-Hydroxyecdysone-20,22-butyridene acetal                                        | <i>Serratula chinensis</i>   | Asteraceae | Roots   |                                              | 61 |
| <b>55</b> | Rhapontisterone R1                                                                | <i>Rhaponticum uniflorum</i> | Asteraceae | Roots   | 70% Ethanol extract                          | 62 |
| <b>56</b> | Turkesterone-2- <i>O</i> -cinnamate                                               | <i>Rhaponticum uniflorum</i> | Asteraceae | Leaves  | Acetone fraction                             | 63 |
| <b>57</b> | Makisterone C-20,22-acetonide                                                     | <i>Rhaponticum uniflorum</i> | Asteraceae | Flowers | 70% EtOH extract, acetone fraction           | 64 |
| <b>58</b> | Ajugasterone C-2,3,20,22-diacetonide                                              | <i>Rhaponticum uniflorum</i> | Asteraceae | Roots   |                                              | 65 |
| <b>59</b> | 5-Deoxykaladasterone-20,22-monoacet onide                                         | <i>Rhaponticum uniflorum</i> | Asteraceae | Roots   |                                              | 65 |
| <b>60</b> | Uniflorsterone                                                                    | <i>Rhaponticum uniflorum</i> | Asteraceae | Roots   |                                              | 66 |

|    |                                                             |                              |            |                                   |                                               |    |
|----|-------------------------------------------------------------|------------------------------|------------|-----------------------------------|-----------------------------------------------|----|
| 61 | Rapisterone D 20-acetate                                    | <i>Leuzea carthamoides</i>   | Asteraceae | Seeds                             | Methanol extract                              | 57 |
| 62 | 22- <i>epi</i> -Ajugasterone C                              | <i>Serratula cichoracea</i>  | Asteraceae | Flowers                           | EtOAc fraction of 70% aqueous ethanol extract | 68 |
| 63 | Ajugasterone 11-acetate                                     | <i>Serratula coronata</i> L. | Asteraceae | Whole parts                       | Ethyl acetate fraction                        | 69 |
| 64 | 3- <i>epi</i> -20-Hydroxyecdysone                           | <i>Serratula coronata</i> L. | Asteraceae | Aerial parts                      | Ethyl acetate fraction                        | 70 |
| 65 | Ecdysone 22-acetate                                         | <i>Serratula coronata</i> L. | Asteraceae | Aerial parts, fresh leaves, juice | Ethyl acetate fraction                        | 71 |
| 66 | (25 <i>S</i> )-Inokosterone 26-acetate                      | <i>Serratula coronata</i> L. | Asteraceae | Aerial parts, fresh leaves, juice | Ethyl acetate fraction                        | 71 |
| 67 | 20,22- <i>O</i> -( <i>R</i> -ethylidene)-20-hydroxyecdysone | <i>Serratula coronata</i> L. | Asteraceae | Aerial parts, fresh leaves, juice | Ethyl acetate fraction                        | 71 |
| 68 | 20,22- <i>O</i> -( <i>R</i> -ethylidene)-Ajugasterone C     | <i>Serratula coronata</i> L. | Asteraceae | Aerial parts, fresh leaves, juice | Ethyl acetate fraction                        | 71 |
| 69 | 25,26-Didehydroponasterone A                                | <i>Klaseopsis chinensis</i>  | Asteraceae | Roots                             | 95% Ethanol extract                           | 72 |
| 70 | Stachysterone C                                             | <i>Klaseopsis chinensis</i>  | Asteraceae | Roots                             | 95% Ethanol extract                           | 72 |
| 71 | 11 $\alpha$ -Hydroxypoststerone                             | <i>Serratula wolffii</i>     | Asteraceae | Aerial parts                      | Methanol extract                              | 73 |
| 72 | Herkesterone<br>(5 $\beta$ ,25-dihydroxydacryhainansterone) | <i>Serratula wolffii</i>     | Asteraceae | Aerial parts                      | Methanol extract                              | 73 |

|    |                                                                                                                              |                          |            |              |                  |    |
|----|------------------------------------------------------------------------------------------------------------------------------|--------------------------|------------|--------------|------------------|----|
| 73 | 25-Hydroxydacryhainansterone                                                                                                 | <i>Serratula wolffii</i> | Asteraceae | Aerial parts | Methanol extract | 74 |
| 74 | 14- <i>epi</i> -20-Hydroxyecdysone                                                                                           | <i>Serratula wolffii</i> | Asteraceae | Aerial parts | Methanol extract | 74 |
| 75 | 2 $\beta$ ,3 $\beta$ ,20 <i>R</i> ,22 <i>R</i> ,25-Pentahydroxy-5 $\beta$ -cholest-6,8(14)-dien                              | <i>Serratula wolffii</i> | Asteraceae | Roots        | Methanol extract | 75 |
| 76 | 24-Methylene-shidasterone                                                                                                    | <i>Serratula wolffii</i> | Asteraceae | Roots        | Methanol extract | 75 |
| 77 | 14 $\alpha$ ,15 $\alpha$ -Epoxy-14,15-dihydrostachysterone B                                                                 | <i>Serratula wolffii</i> | Asteraceae | Roots        | Methanol extract | 75 |
| 78 | 20,22-Didehydro taxisterone                                                                                                  | <i>Serratula wolffii</i> | Asteraceae | Roots        | Methanol extract | 76 |
| 79 | 1-Hydroxy-20,22-didehydrotaxisterone                                                                                         | <i>Serratula wolffii</i> | Asteraceae | Roots        | Methanol extract | 76 |
| 80 | Serfurosterone A                                                                                                             | <i>Serratula wolffii</i> | Asteraceae | Roots        | Methanol extract | 77 |
| 81 | Serfurosterone B                                                                                                             | <i>Serratula wolffii</i> | Asteraceae | Roots        | Methanol extract | 77 |
| 82 | 14,15 $\alpha$ -Epoxy-(20 <i>R</i> ,22 <i>R</i> )-2 $\beta$ ,3 $\beta$ ,20,22,25-pentahydroxy-5 $\beta$ -cholesta-7-en-6-one | <i>Serratula wolffii</i> | Asteraceae | Roots        | Methanol extract | 78 |
| 83 | (20 <i>R</i> ,22 <i>R</i> )-2 $\beta$ ,3 $\alpha$ ,20,22,25-Pentahydroxy-5 $\beta$ -cholesta-7-en-6-one                      | <i>Serratula wolffii</i> | Asteraceae | Roots        | Methanol extract | 78 |
| 84 | 22-Methylene-2 $\beta$ ,3 $\beta$ ,11 $\alpha$ ,14 $\alpha$ ,25-pentahydroxy-5 $\beta$ -cholesta-7-en-6-one                  | <i>Serratula wolffii</i> | Asteraceae | Roots        | Methanol extract | 78 |
| 85 | 2 $\beta$ ,3 $\beta$ ,14 $\alpha$ ,25-Tetrahydroxy-5 $\beta$ -cholesta-7,20(22)-dien-6-one                                   | <i>Serratula wolffii</i> | Asteraceae | Roots        | Methanol extract | 78 |

|           |                                                                                                       |                              |                 |              |                                                                     |    |
|-----------|-------------------------------------------------------------------------------------------------------|------------------------------|-----------------|--------------|---------------------------------------------------------------------|----|
| <b>86</b> | 1 $\beta$ ,2 $\beta$ ,3 $\beta$ ,14 $\alpha$ ,25-Pentahydroxy-5 $\beta$ -cholesta-7,20(22)-dien-6-one | <i>Serratula wolffii</i>     | Asteraceae      | Roots        | Methanol extract                                                    | 78 |
| <b>87</b> | (24 <i>R</i> )-24-(2-Hydroxyethyl)-20-hydroxyecdysone                                                 | <i>Serratula strangulate</i> | Asteraceae      | Whole plant  | Alcohol extract                                                     | 79 |
| <b>88</b> | Brainesteroside A                                                                                     | <i>Brainea insignis</i>      | Blechnaceae     | Rhizomes     | 95% Ethanolic extract of EtOAc-and <i>n</i> -BuOH-soluble fractions | 80 |
| <b>89</b> | Brainesteroside B                                                                                     | <i>Brainea insignis</i>      | Blechnaceae     | Rhizomes     | 95% Ethanolic extract of EtOAc-and <i>n</i> -BuOH-soluble fractions | 80 |
| <b>90</b> | Brainesteroside C                                                                                     | <i>Brainea insignis</i>      | Blechnaceae     | Rhizomes     | 95% Ethanolic extract of EtOAc-and <i>n</i> -BuOH-soluble fractions | 80 |
| <b>91</b> | Brainesteroside D                                                                                     | <i>Brainea insignis</i>      | Blechnaceae     | Rhizomes     | 95% Ethanolic extract of EtOAc-and <i>n</i> -BuOH-soluble fractions | 80 |
| <b>92</b> | Brainesteroside E                                                                                     | <i>Brainea insignis</i>      | Blechnaceae     | Rhizomes     | 95% Ethanolic extract of EtOAc-and <i>n</i> -BuOH-soluble fractions | 80 |
| <b>93</b> | Integristerone A 25-acetate                                                                           | <i>Silene brahuica</i>       | Caryophyllaceae | Roots        | Methanol extract                                                    | 81 |
| <b>94</b> | Japonicone<br>(22,25-epoxy-24-methylene-2,3,14,20-tetrahydroxycholest-7-en-6-one)                     | <i>Sagina japonica</i>       | Caryophyllaceae | Whole plants | 95% Ethanol extract                                                 | 82 |
| <b>95</b> | 2-Dehydroxyecdysterone-3- <i>O</i> -benzoate                                                          | <i>Silene wallichiana</i>    | Caryophyllaceae | Roots        | Ethanol extract                                                     | 83 |
| <b>96</b> | 2 Deoxyecdysterone-25-acetate                                                                         | <i>Silene wallichiana</i>    | Caryophyllaceae | Roots        | Ethanol extract                                                     | 84 |

|            |                                                                                                      |                              |                 |              |                                                        |    |
|------------|------------------------------------------------------------------------------------------------------|------------------------------|-----------------|--------------|--------------------------------------------------------|----|
| <b>97</b>  | 5 $\alpha$ -2-Deoxy-20-hydroxyecdysone<br>20,22-acetonide                                            | <i>Silene viridiflora</i>    | Caryophyllaceae | Whole plants | Methanol extract                                       | 85 |
| <b>98</b>  | Makisterone C 2,3;20,22-diacetonide                                                                  | <i>Silene viridiflora</i>    | Caryophyllaceae | Whole plants | Methanol extract                                       | 85 |
| <b>99</b>  | (11 $\alpha$ )-11-Hydroxyshidasterone                                                                | <i>Serratula wolffii</i>     | Caryophyllaceae | Roots        | Methanol and purified by<br>precipitation with acetone | 86 |
| <b>100</b> | (2 $\beta$ ,3 $\beta$ ,5 $\beta$ ,14 $\beta$ ,22 $R$ )-2,3,20,22,25-Pentahydroxycholest-7-en-6-one   | <i>Serratula wolffii</i>     | Caryophyllaceae | Roots        | Methanol and purified by<br>precipitation with acetone | 86 |
| <b>101</b> | (2 $\beta$ ,3 $\alpha$ ,5 $\beta$ ,14 $\alpha$ ,22 $R$ )-2,3,20,22,25-pentahydroxycholest-7-en-6-one | <i>Serratula wolffii</i>     | Caryophyllaceae | Roots        | Methanol and purified by<br>precipitation with acetone | 86 |
| <b>102</b> | 22-Dehydro-20-deoxy ajugasterone C                                                                   | <i>Serratula wolffii</i>     | Caryophyllaceae | Roots        | Methanol and purified by<br>precipitation with acetone | 87 |
| <b>103</b> | 1-Hydroxy-22-deoxy-20,21-didehydroecdysone                                                           | <i>Serratula wolffii</i>     | Caryophyllaceae | Roots        | Methanol and purified by<br>precipitation with acetone | 87 |
| <b>104</b> | 22-Deoxy-20,21-didehydro ecdysone                                                                    | <i>Serratula wolffii</i>     | Caryophyllaceae | Roots        | Methanol and purified by<br>precipitation with acetone | 87 |
| <b>105</b> | Ponasterone A-22-apioside                                                                            | <i>Serratula wolffii</i>     | Caryophyllaceae | Roots        | Methanol extract                                       | 88 |
| <b>106</b> | 3- <i>epi</i> -Shidasterone                                                                          | <i>Serratula wolffii</i>     | Caryophyllaceae | Roots        | Methanol extract                                       | 88 |
| <b>107</b> | 26-Hydroxyintegristerone A                                                                           | <i>Silene frivaldszkyana</i> | Caryophyllaceae | Aerial parts | 70% Aqueous ethanol<br>extract                         | 89 |
| <b>108</b> | 2-Deoxy-20-hydroxyecdysone<br>25-glucoside                                                           | <i>Silene gigantea</i>       | Caryophyllaceae | Aerial parts | 70% Aqueous ethanol<br>extract                         | 89 |

|            |                                                                                      |                                               |                 |              |                                                     |    |
|------------|--------------------------------------------------------------------------------------|-----------------------------------------------|-----------------|--------------|-----------------------------------------------------|----|
| <b>109</b> | 2-Deoxy-5,20,26-trihydroxy ecdysone                                                  | <i>Silene viridiflora</i>                     | Caryophyllaceae | Aerial parts | Methanol and purified by precipitation with acetone | 92 |
| <b>110</b> | 5,20,26-Trihydroxyecdysone<br>20,22-acetonide                                        | <i>Silene viridiflora</i>                     | Caryophyllaceae | Aerial parts | Methanol and purified by precipitation with acetone | 92 |
| <b>111</b> | 2-Deoxy-5,20,26-trihydroxyecdysone<br>20,22-acetonide                                | <i>Silene viridiflora</i>                     | Caryophyllaceae | Aerial parts | Methanol and purified by precipitation with acetone | 92 |
| <b>112</b> | 20,26-Dihydroxyecdysone<br>20,22-acetonide                                           | <i>Silene viridiflora</i>                     | Caryophyllaceae | Aerial parts | Methanol and purified by precipitation with acetone | 92 |
| <b>113</b> | 20-Hydroxyecdysone<br>20,22-monoacetonide-25-acetate                                 | <i>Silene viridiflora</i>                     | Caryophyllaceae | Aerial parts | <i>n</i> -BuOH extract                              | 90 |
| <b>114</b> | 2,22-Diacetate-20,26-dihydroxyecdysone                                               | <i>Silene viridiflora</i>                     | Caryophyllaceae | Aerial parts | Methanol extract, ethyl acetate fraction            | 91 |
| <b>115</b> | 3,22-Diacetate-20,26-dihydroxyecdysone                                               | <i>Silene viridiflora</i>                     | Caryophyllaceae | Aerial parts | Methanol extract, ethyl acetate fraction            | 91 |
| <b>116</b> | Sileneoside<br>H/22- <i>O</i> - $\alpha$ -D-galactosylintegristerone A<br>25-acetate | <i>Silene brahuica</i>                        | Caryophyllaceae | Roots        | Methanol extract                                    | 93 |
| <b>117</b> | 9 $\alpha$ ,20-Dihydroxyecdysone                                                     | <i>Silene italic</i> ssp.<br><i>nemoralis</i> | Caryophyllaceae | Aerial parts | Methanol extract                                    | 94 |
| <b>118</b> | 9 $\beta$ ,20-Dihydroxyecdysone                                                      | <i>Silene italic</i> ssp.<br><i>nemoralis</i> | Caryophyllaceae | Aerial parts | Methanol extract                                    | 95 |

|     |                                                                                                                                         |                                             |                 |              |                                           |     |
|-----|-----------------------------------------------------------------------------------------------------------------------------------------|---------------------------------------------|-----------------|--------------|-------------------------------------------|-----|
| 119 | 3- <i>O</i> - $\beta$ -D-Glucopyranosyl-3 $\beta$ ,25-dihydroxy-5 $\beta$ -cholest-7-en-6-one-25- <i>O</i> - $\beta$ -D-glucopyranoside | <i>Silene montbretiana</i>                  | Caryophyllaceae | Whole plant  | Methanol extract, <i>n</i> -BuOH fraction | 96  |
| 120 | 2,3-Diacetate-22-benzoate-20-hydroxyecdysone                                                                                            | <i>Silene guntensis</i> B. Fedtsch          | Caryophyllaceae | Aerial parts | Methanol extract, <i>n</i> -BuOH fraction | 97  |
| 121 | 2-Deoxyecdysone 22 $\beta$ -D-glucoside                                                                                                 | <i>Silene pseudotites</i>                   | Caryophyllaceae | Aerial parts | Methanol extract                          | 98  |
| 122 | 2-Deoxy-20,26-dihydroxyecdysone                                                                                                         | <i>Silene pseudotites</i>                   | Caryophyllaceae | Aerial parts | Methanol extract                          | 98  |
| 123 | 2-Deoxypolypodine B 3 $\beta$ -D-glucoside                                                                                              | <i>Silene pseudotites</i>                   | Caryophyllaceae | Aerial parts | Methanol extract                          | 98  |
| 124 | 2-Deoxy-21-hydroxyecdysone                                                                                                              | <i>Silene otites</i>                        | Caryophyllaceae | Aerial parts | Methanol extract                          | 99  |
| 125 | 5 $\alpha$ -2-Deoxy-21-hydroxyecdysone                                                                                                  | <i>Silene otites</i>                        | Caryophyllaceae | Aerial parts | Methanol extract                          | 99  |
| 126 | 3 $\alpha$ ,14 $\alpha$ ,22 <i>R</i> ,25-Tetrahydroxy-5 $\beta$ (H)-cholest-7-en-6-one                                                  | <i>Acanthophyllum gypsophiloides</i>        | Caryophyllaceae | Aerial parts | 70% Aqueous ethanol extract               | 100 |
| 127 | 2,22-Dideoxy-20-hydroxyecdysone 3 $\beta$ - <i>O</i> - $\beta$ -D-glucopyranoside                                                       | <i>Cucubalus baccifer</i>                   | Caryophyllaceae | Whole herbs  | 95% ethanol extract                       | 101 |
| 128 | 2-Deoxy-20-hydroxyecdysone-22- <i>O</i> - $\beta$ -D-glucopyranoside                                                                    | <i>Silene italica</i> ssp. <i>nemoralis</i> | Caryophyllaceae | Whole herbs  | Methanol extract                          | 102 |
| 129 | 22-Dehydroecdysone                                                                                                                      | <i>Nomuraea rileyi</i> (Fungus)             | Clavicipitaceae |              |                                           | 103 |
| 130 | 11 $\alpha$ -Hydroxyrubrosterone                                                                                                        | <i>Cyanotis arachnoidea</i>                 | Commelinaceae   | Whole plants | 70% Ethanol extract                       | 104 |

|     |                                                                                                             |                                          |                |             |                                                                             |     |
|-----|-------------------------------------------------------------------------------------------------------------|------------------------------------------|----------------|-------------|-----------------------------------------------------------------------------|-----|
| 131 | Dacryhainansterone                                                                                          | <i>Cyanotis arachnoidea</i>              | Commelinaceae  | Roots       | Methanol extract                                                            | 105 |
| 132 | Calonysterone                                                                                               | <i>Cyanotis arachnoidea</i>              | Commelinaceae  | Roots       | Methanol extract                                                            | 105 |
| 133 | Cyanosterone A                                                                                              | <i>Cyanotis arachnoidea</i>              | Commelinaceae  | Whole plant | Hot 70% EtOH;<br>fractionation petroleum<br>ether, EtOAc and <i>n</i> -BuOH | 106 |
| 134 | Cyanosterone B                                                                                              | <i>Cyanotis arachnoidea</i>              | Commelinaceae  |             |                                                                             | 107 |
| 135 | 22-oxo-Ajugasterone C                                                                                       | <i>Cyanotis arachnoidea</i>              | Commelinaceae  |             |                                                                             | 108 |
| 136 | 22-oxo-20-Hydroxyecdysone                                                                                   | <i>Cyanotis arachnoidea</i>              | Commelinaceae  |             |                                                                             | 108 |
| 137 | Ajugasterone C 2-acetate                                                                                    | <i>Cyanotis arachnoidea</i>              | Commelinaceae  | Whole plant | Methanol extract                                                            | 109 |
| 138 | Shidasterone 3-acetate                                                                                      | <i>Cyanotis arachnoidea</i>              | Commelinaceae  | Whole plant | Methanol extract                                                            | 109 |
| 139 | 3 $\beta$ ,4 $\alpha$ ,14 $\alpha$ ,20 <i>R</i> ,22 <i>R</i> ,25-Hexahydroxy-5 $\alpha$ -cholest-7-en-6-one | <i>Cyanotis arachnoidea</i> C. B. Clarke | Commelinaceae  |             |                                                                             | 110 |
| 140 | 5 $\beta$ -Hydroxypoststerone                                                                               | <i>Cyanotis longifolia</i>               | Commelinaceae  | Roots       | Absolute ethanol extract                                                    | 111 |
| 141 | 14,15-Dehydro-poststerone 2-acetate                                                                         | <i>Cyanotis longifolia</i>               | Commelinaceae  | Roots       | Absolute ethanol extract                                                    | 111 |
| 142 | Poststerone 2-acetate                                                                                       | <i>Cyanotis longifolia</i>               | Commelinaceae  | Roots       | Absolute ethanol extract                                                    | 111 |
| 143 | 24- <i>epi</i> -Atrotosterone A                                                                             | <i>Cyanotis longifolia</i>               | Commelinaceae  | Roots       | Absolute ethanol extract                                                    | 111 |
| 144 | Ajugasterone C 3-acetate                                                                                    | <i>Cyanotis longifolia</i>               | Commelinaceae  | Roots       | Absolute ethanol extract                                                    | 111 |
| 145 | Callecdysterol A<br>[2 $\beta$ ,3 $\beta$ ,11 $\alpha$ ,14 $\alpha$ ,17 $\beta$ -pentahydroxy-5 $\alpha$ -a | <i>Callisia fragrans</i>                 | Commelinaceae, | Stems       | MeOH extract, H <sub>2</sub> O<br>fraction                                  | 112 |

ndrost-7(8)-en-6-one]

|     |                                                                                                                                            |                                                 |                |              |                                         |     |
|-----|--------------------------------------------------------------------------------------------------------------------------------------------|-------------------------------------------------|----------------|--------------|-----------------------------------------|-----|
| 146 | Callecdysterol B<br>[2 $\beta$ ,3 $\beta$ ,5 $\beta$ ,11 $\alpha$ ,14 $\alpha$ ,17 $\beta$ -hexahydroxy-5 $\alpha$ -androst-7(8)-en-6-one] | <i>Callisia fragrans</i>                        | Commelinaceae, | Stems        | MeOH extract, H <sub>2</sub> O fraction | 112 |
| 147 | Callecdysterol C<br>[2 $\beta$ ,3 $\beta$ ,14 $\alpha$ ,17 $\beta$ -tetrahydroxy-5 $\alpha$ -androst-7(8),9(11)-dien-6-one]                | <i>Callisia fragrans</i>                        | Commelinaceae, | Stems        | MeOH extract, H <sub>2</sub> O fraction | 112 |
| 148 | (20R)-5 $\beta$ -11 $\alpha$ ,20-Trihydroxyecdysone                                                                                        | <i>Dioscorea dumetorum</i>                      | Dioscoreaceae  | Rhizomes     | MeOH:H <sub>2</sub> O (7:3) extract     | 113 |
| 149 | (22R,24R,25S,26S)-2 $\beta$ ,3 $\beta$ ,14 $\alpha$ ,20R-Tetrahydroxy-26 $\alpha$ -methoxy-6-oxo-stigmast-7-ene-22,26-lactone              | <i>Diplopterygium rufopilosum</i>               | Gleicheniaceae | Fronds       | 95% Ethanol extract                     | 114 |
| 150 | (22R,24R,25S)-2 $\beta$ ,3 $\beta$ ,14 $\alpha$ ,20R,26S-Pentahydroxy-6-oxo-stigmast-7-ene-22,26-lactone                                   | <i>Diplopterygium rufopilosum</i>               | Gleicheniaceae | Fronds       | 95% Ethanol extract                     | 114 |
| 151 | (22R,25S)-2 $\beta$ ,3 $\beta$ ,14 $\alpha$ ,20R,24S-Pentahydroxy-6,26-dioxo-stigmast-7-ene-22,26-lactone                                  | <i>Diplopterygium rufopilosum</i>               | Gleicheniaceae | Fronds       | 95% Ethanol extract                     | 114 |
| 152 | 28- <i>epi</i> -Cyasterone                                                                                                                 | <i>Eriophyton wallchii</i>                      | Lamiaceae      | Whole herb   | 95% Ethanol extract                     | 115 |
| 153 | Ajugalide-E                                                                                                                                | <i>Ajuga taiwanensis</i>                        | Lamiaceae      | Whole plants | Methanolic extract                      | 116 |
| 154 | Breviflorasterone                                                                                                                          | <i>Ajuga macrosperma</i> var. <i>breviflora</i> | Lamiaceae      | Roots        | Methanol extract                        | 117 |
| 155 | Ajugacetalsterone C                                                                                                                        | <i>Ajuga macrosperma</i> var. <i>breviflora</i> | Lamiaceae      | Roots        | Methanol extract                        | 117 |

|            |                                       |                                                          |                       |                              |                                              |                     |
|------------|---------------------------------------|----------------------------------------------------------|-----------------------|------------------------------|----------------------------------------------|---------------------|
| <b>156</b> | Ajugacetalsterone D                   | <i>Ajuga macrosperma</i> var.<br><i>breviflora</i>       | Lamiaceae             | Roots                        | Methanol extract                             | 117                 |
| <b>157</b> | Decumbesterone A                      | <i>Ajuga decumbens</i>                                   | Lamiaceae             | Whole plants                 | Methanol extract                             | 118                 |
| <b>158</b> | Ajugacetalsterone E                   | <i>Ajuga decumbens</i>                                   | Lamiaceae             | Whole plants                 | 85% Ethanol extract                          | 119                 |
| <b>159</b> | 22-Dehydrocyasterone-2-glucoside      | <i>Ajuga nipponensis</i>                                 | Lamiaceae             | Aerial parts                 | Methanol extract                             | 120                 |
| <b>160</b> | Ajugacetalsterone A                   | <i>Ajuga nipponensis</i><br><i>Ajuga forrestii</i> Diels | Lamiaceae<br>Labiatae | Aerial parts<br>Whole plants | Methanol extract<br>Aqueous extract          | 119,1<br>20,<br>170 |
| <b>161</b> | Ajugacetalsterone B                   | <i>Ajuga nipponensis</i>                                 | Lamiaceae             | Aerial parts                 | Methanol extract                             | 120                 |
| <b>162</b> | 25-Hydroxy-atrotosterone A            | <i>Ajuga turkestanica</i>                                | Lamiaceae             | Roots                        | Methanol extract,<br><i>n</i> -BuOH fraction | 121                 |
| <b>163</b> | 11-Hydroxy-cyasterone                 | <i>Ajuga turkestanica</i>                                | Lamiaceae             | Roots                        | Methanol extract,<br><i>n</i> -BuOH fraction | 121                 |
| <b>164</b> | 11-Hydroxy-sidisterone                | <i>Ajuga turkestanica</i>                                | Lamiaceae             | Roots                        | Methanol extract,<br><i>n</i> -BuOH fraction | 121                 |
| <b>165</b> | Turkesterone 22-acetate               | <i>Ajuga turkestanica</i>                                | Lamiaceae             | Roots                        | Methanol extract,<br><i>n</i> -BuOH fraction | 121                 |
| <b>166</b> | 22-oxo-Turkesterone                   | <i>Ajuga turkestanica</i>                                | Lamiaceae             | Roots                        | Methanol extract,<br><i>n</i> -BuOH fraction | 121                 |
| <b>167</b> | 11-Hydroxy- $\Delta$ 24-capitasterone | <i>Ajuga turkestanica</i>                                | Lamiaceae             | Roots                        | Methanol extract,<br><i>n</i> -BuOH fraction | 121                 |

|            |                                                      |                                             |           |            |                                                              |     |
|------------|------------------------------------------------------|---------------------------------------------|-----------|------------|--------------------------------------------------------------|-----|
| <b>168</b> | Turkesterone 20,22-acetonide                         | <i>Ajuga turkestanica</i>                   | Lamiaceae | Roots      | Methanol extract,<br><i>n</i> -BuOH fraction                 | 121 |
| <b>169</b> | Reptanslactone A                                     | <i>Ajuga reptans</i> var.<br><i>reptans</i> | Lamiaceae | Herb       | Methanol extract                                             | 122 |
| <b>170</b> | Reptanslactone B                                     | <i>Ajuga reptans</i> var.<br><i>reptans</i> | Lamiaceae | Herb       | Methanol extract                                             | 122 |
| <b>171</b> | Sendreisterone                                       | <i>Ajuga reptans</i> var.<br><i>reptans</i> | Lamiaceae | Herb       | Methanol extract                                             | 122 |
| <b>172</b> | 21-Hydroxyshidasterone                               | <i>Vitex doniana</i>                        | Lamiaceae | Stem bark  | Methanol extract                                             | 123 |
| <b>173</b> | 11 $\beta$ -Hydroxy-20-deoxyshidasterone             | <i>Vitex doniana</i>                        | Lamiaceae | Stem bark  | Methanol extract                                             | 123 |
| <b>174</b> | 2,3-Acetonide-24-hydroxyecdysone                     | <i>Vitex doniana</i>                        | Lamiaceae | Stem bark  | Methanol extract                                             | 123 |
| <b>175</b> | 24- <i>epi</i> -Pinnatasterone                       | <i>Vitex scabra</i>                         | Lamiaceae | Stem bark  | Methanol extract,<br><i>n</i> -BuOH fractions                | 124 |
| <b>176</b> | Scabrasterone                                        | <i>Vitex scabra</i>                         | Lamiaceae | Stem bark  | Methanol extract,<br><i>n</i> -BuOH fractions                | 124 |
| <b>177</b> | 26-Hydroxypinnatasterone                             | <i>Vitex cymosa</i>                         | Lamiaceae | Stem barks | Ethanol extract, CH <sub>2</sub> Cl <sub>2</sub><br>fraction | 125 |
| <b>178</b> | (24 <i>R</i> )-11 $\alpha$ ,20,24-Trihydroxyecdysone | <i>Vitex canescens</i>                      | Lamiaceae | Root barks | Ethanol extract, <i>n</i> -BuOH<br>fraction                  | 126 |
| <b>179</b> | 11 $\alpha$ ,20,26-Trihydroxyecdysone                | <i>Vitex canescens</i>                      | Lamiaceae | Root barks | Ethanol extract, <i>n</i> -BuOH<br>fraction                  | 126 |
| <b>180</b> | 24-Methylshidasterone                                | <i>Vitex canescens</i>                      | Lamiaceae | Stem barks | <i>n</i> -Hexane extract,<br>methanol extract                | 127 |

|            |                                                                                                                                        |                                           |                |              |                                                                  |     |
|------------|----------------------------------------------------------------------------------------------------------------------------------------|-------------------------------------------|----------------|--------------|------------------------------------------------------------------|-----|
| <b>181</b> | Stachysterone A-20,22-acetonide                                                                                                        | <i>Asparagus filicinus</i><br>Buch.-Ham.  | Liliaceae      | Roots        | 95% Ethanol extract,<br>chloroform fraction                      | 128 |
| <b>182</b> | Limnantheoside C<br>(20-Hydroxyecdysone<br>3- <i>O</i> - $\beta$ -D-glucopyranosyl-[1 $\rightarrow$ 3]- $\beta$ -D-xyl<br>opyranoside) | <i>Limnanthes alba</i> Hartw.             | Limnanthaceae  | Seeds        | Methanol extract                                                 | 129 |
| <b>183</b> | Lygodiumsteroside A                                                                                                                    | <i>Lygodium japonicum</i><br>(Thunb.) Sw. | Lygodiaceae    | Roots        | 70% Ethanol extract,<br>methanol fraction                        | 130 |
| <b>184</b> | 25-Acetoxy-20-hydroxyecdysone-3- <i>O</i> - $\beta$ -<br>-D-glucopyranoside                                                            | <i>Sida rhombifolia</i>                   | Malvaceae      | Whole plants | Methanol extract                                                 | 131 |
| <b>185</b> | Pterosterone-3- <i>O</i> - $\beta$ -D-glucopyranoside                                                                                  | <i>Sida rhombifolia</i>                   | Malvaceae      | Whole plants | Methanol extract                                                 | 131 |
| <b>186</b> | Ecdysone-3- <i>O</i> - $\beta$ -D-glucopyranoside                                                                                      | <i>Sida rhombifolia</i>                   | Malvaceae      | Whole plants | Methanol extract                                                 | 131 |
| <b>187</b> | 20-Hydroxy-24-hydroxymethyl<br>ecdysone                                                                                                | <i>Sida spinosa</i>                       | Malvaceae      | Aerial parts | Methanol extract                                                 | 132 |
| <b>188</b> | Glutinosterone                                                                                                                         | <i>Sida glutinosa</i>                     | Malvaceae      | Aerial parts | Methanol extract                                                 | 133 |
| <b>189</b> | Sphenocentroside A                                                                                                                     | <i>Sphenocentrum</i><br><i>jollyanum</i>  | Menispermaceae | Roots        | 70% Methanol extract,<br>ethyl acetate fraction                  | 134 |
| <b>190</b> | Sphenocentroside B                                                                                                                     | <i>Sphenocentrum</i><br><i>jollyanum</i>  | Menispermaceae | Roots        | 70% Methanol extract,<br>ethyl acetate fraction                  | 134 |
| <b>191</b> | Cycleasterone A                                                                                                                        | <i>Cyclea barbata</i> Miers               | Menispermaceae | Stems        | 95% Ethanol extract,<br>CH <sub>2</sub> Cl <sub>2</sub> fraction | 135 |
| <b>192</b> | 3-Deoxy-1 $\beta$ ,20-dihydroxyecdysone                                                                                                | <i>Diploclisia glaucescens</i>            | Menispermaceae | Leaves       | Methanol extract                                                 | 137 |

|            |                                                                                       |                                        |                |               |                                                  |     |
|------------|---------------------------------------------------------------------------------------|----------------------------------------|----------------|---------------|--------------------------------------------------|-----|
| <b>193</b> | 2-Deoxy-5 $\beta$ ,20-dihydroxyecdysone                                               | <i>Diploclisia glaucescens</i>         | Menispermaceae | Fruits        | Ethyl acetate extract                            | 138 |
| <b>194</b> | Diploclidine                                                                          | <i>Diploclisia glaucescens</i>         | Menispermaceae | Leaves        | Methanol extract                                 | 136 |
| <b>195</b> | Fibraurecdyside A                                                                     | <i>Fibraurea tinctoria</i> Lour.       | Menispermaceae | Whole plant   | Methanol extract,<br><i>n</i> -BuOH fraction     | 139 |
| <b>196</b> | 5-Hydroxyecdysone                                                                     | <i>Polypodium vulgare</i>              | Polypodiaceae  | Rhizomes      | Methanol extract                                 | 140 |
| <b>197</b> | 20-Deoxyshidasterone                                                                  | <i>Polypodium vulgare</i>              | Polypodiaceae  | Rhizomes      | Methanol extract                                 | 140 |
| <b>198</b> | Polypodine B 2- $\beta$ -D-glucoside                                                  | <i>Polypodium vulgare</i>              | Polypodiaceae  | Rhizomes      | Methanol extract                                 | 140 |
| <b>199</b> | 20-Deoxymakisterone A                                                                 | <i>Microsorium scolopendria</i>        | Polypodiaceae  | Fronds        | Ethanol extract                                  | 141 |
| <b>200</b> | 25-Epimer of AmarasteroneA                                                            | <i>Microsorium scolopendria</i>        | Polypodiaceae  | Fronds        | Ethanol extract                                  | 141 |
| <b>201</b> | 25-Deoxyecdysone 22- $\beta$ -D-glucoside                                             | <i>Microsorium scolopendria</i>        | Polypodiaceae  | Fronds        | Ethanol extract                                  | 141 |
| <b>202</b> | <i>E</i> -2-Deoxy-20-hydroxyecdysone<br>3-[4-(1- $\beta$ -D-glucopyranosyl)]-caffeate | <i>Microsorium membranifolium</i>      | Polypodiaceae  | Milled fronds | Ethanol extract                                  | 142 |
| <b>203</b> | 2-Deoxyecdysone 3-[4-(1- $\beta$ -D<br>glucopyranosyl)]-ferulate                      | <i>Microsorium membranifolium</i>      | Polypodiaceae  | Fronds        | Ethanol extract                                  | 143 |
| <b>204</b> | 2-Deoxyecdysone<br>25- $\alpha$ -L-rhamnopyranoside                                   | <i>Microsorium membranifolium</i>      | Polypodiaceae  | Fronds        | Ethanol extract                                  | 143 |
| <b>205</b> | Ponasteroside B                                                                       | <i>Lepidogrammitis drymoglossoides</i> | Polypodiaceae  | Whole plants  | 75% Ethanol extract,<br><i>n</i> -BuOH fraction. | 144 |

|            |                                                                                                                                       |                                             |               |            |                                                               |     |
|------------|---------------------------------------------------------------------------------------------------------------------------------------|---------------------------------------------|---------------|------------|---------------------------------------------------------------|-----|
| <b>206</b> | (20 <i>S</i> ,20 <i>R</i> ,24 <i>R</i> )-16,22-Epoxy-3 <i>β</i> ,14 <i>α</i> ,23 <i>β</i> ,25-tetrahydroxyergost-7-en-6-one           | <i>Polyporus umbellatus</i>                 | Polyporaceae  | Sclerotia  | 95% Ethanol extract, CH <sub>2</sub> Cl <sub>2</sub> fraction | 145 |
| <b>207</b> | (23 <i>R</i> ,24 <i>R</i> ,25 <i>R</i> )-23,26-Epoxy-3 <i>β</i> ,14 <i>α</i> ,20 <i>α</i> ,22 <i>α</i> -tetrahydroxyergost-7-en-6-one | <i>Polyporus umbellatus</i>                 | Polyporaceae  | Sclerotia  | 95% Ethanol extract, CH <sub>2</sub> Cl <sub>2</sub> fraction | 145 |
| <b>208</b> | Polyporoid A                                                                                                                          | <i>Polyporus umbellatus</i>                 | Polyporaceae  | Sclerotium | Methanol extract, ethyl acetate fraction                      | 146 |
| <b>209</b> | Polyporoid B                                                                                                                          | <i>Polyporus umbellatus</i>                 | Polyporaceae  | Sclerotium | Methanol extract, ethyl acetate fraction                      | 146 |
| <b>210</b> | Polyporoid C                                                                                                                          | <i>Polyporus umbellatus</i>                 | Polyporaceae  | Sclerotium | Methanol extract, ethyl acetate fraction                      | 146 |
| <b>211</b> | Alfredensterol                                                                                                                        | <i>Laurencia alfredensis</i><br>(red Algae) | Rhodomelaceae | Fresh alga | Methanol extract                                              | 147 |
| <b>212</b> | 3-Deacetoxy alfredensterol                                                                                                            | <i>Laurencia alfredensis</i><br>(red Algae) | Rhodomelaceae | Fresh alga | Methanol extract                                              | 147 |
| <b>213</b> | 14 <i>α</i> -Hydroxy alfredensterol                                                                                                   | <i>Laurencia alfredensis</i><br>(red Algae) | Rhodomelaceae | Fresh alga | Methanol extract                                              | 147 |
| <b>214</b> | 7,8 <i>β</i> -Dihydroponasterone A                                                                                                    | <i>Taxus cuspidate</i>                      | Taxaceae      | Needles    | Methanol extract                                              | 148 |
| <b>215</b> | Ponasterone A<br>20,22- <i>p</i> -hydroxybenzylidene acetal                                                                           | <i>Taxus canadensis</i> Marsh               | Taxaceae      | Needles    | Methanol extract                                              | 149 |
| <b>216</b> | Ponasterone A 20,22-acetonide                                                                                                         | <i>Taxus canadensis</i> Marsh               | Taxaceae      | Needles    | Methanol extract                                              | 149 |

---

*n*-BuOH, normal butanol; EtOAc, ethyl acetate; CH<sub>2</sub>Cl<sub>2</sub>, dichloromethane.
